# Supplementary material for: The Biology of Vasopressin
Source: MDPI journal article supplement (doi:10.3390/biomedicines9010089), 2021-01-18
Supplement: s1 [file s1]

**Table S1:** Clinical trials of AVP antagonists and agonists.

| Molecule  | Clinical trial # | Target organ | Trial description                                                                                                                                                                                                                                       | Reference                 |
|-----------|------------------|--------------|---------------------------------------------------------------------------------------------------------------------------------------------------------------------------------------------------------------------------------------------------------|---------------------------|
| Tolvaptan | NCT01348035      | Kidney       | Completed; Phase N/A; 30 ADPKD patients. 5-year study. Compare changes in total kidney volume (TKV) with water load.                                                                                                                                    | Clinicaltrials.gov        |
| Tolvaptan | NCT01973140      | Kidney       | Completed; Phase 4 trial; 17 participants; Determine changes in urine output; hematic AVP and Na <sup>+</sup> (30 or 60 mg tolvaptan).                                                                                                                  | Clinicaltrials.gov        |
| Tolvaptan | NCT02160145      | Kidney       | Completed; Phase 3b trial; 1370 ADPKD patients between late stage 2 to early stage 4 CKD, multi-center, randomized. Compare efficacy and safety of tolvaptan (45 to 120 mg/day, split-dose).                                                            | Clinicaltrials.gov        |
| Tolvaptan | NCT01638663      | Kidney       | Completed; Phase 2 trial; 20 healthy participants. Tolvaptan effects on water, Na <sup>+</sup> and K <sup>+</sup> excretion, hematic vasoactive hormones, blood pressure, arterial function with/without NO synthesis inhibition (15 mg/day for 1 day). | Clinicaltrials.gov        |
| Tolvaptan | 2006-002768-24   | Kidney       | Completed; Phase 3 trial; ADPKD patients; multi-center, double-blind. Evaluate tolvaptan long-term efficacy through TKV and hepatotoxicity.                                                                                                             | Clinicaltrialsregister.eu |
| Tolvaptan | NCT01210560      | Kidney       | Completed; Phase 2 trial; 25 ADPKD patients. Pharmacokinetics and pharmacodynamics, adverse events of immediate vs. modified release formulation (20-120 mg for 7 days).                                                                                | Clinicaltrials.gov        |
| Tolvaptan | 2014-001516-19   | Kidney       | Completed; Phase 3 trial; ADPKD patients. Evaluate long term safety of titrated immediate-release tolvaptan (OPC 41061, 30-120 mg/day, split dose).                                                                                                     | Clinicaltrialsregister.eu |
| Tolvaptan | NCT00428948      | Kidney       | Completed; Phase 3 trial; 1445 ADPKD patients. Evaluate 36 months safety and efficacy (45/15 mg, 60/30 mg, or 90/30 mg oral                                                                                                                             | Clinicaltrials.gov        |

|           |                |        |                                                                                                                                                                                                                    |                           |
|-----------|----------------|--------|--------------------------------------------------------------------------------------------------------------------------------------------------------------------------------------------------------------------|---------------------------|
|           |                |        | tolvaptan for 36 months).                                                                                                                                                                                          |                           |
| Tolvaptan | NCT00413777    | Kidney | Completed; Phase 2 trial; 46 ADPKD participants. Evaluate 34 months safety, tolerability, efficacy (30-120 mg oral tolvaptan).                                                                                     | Clinicaltrials.gov        |
| Tolvaptan | 2010-018401-10 | Kidney | Completed; Phase 3 trial; ADPKD patients. Efficacy and safety of long term oral tolvaptan administration.                                                                                                          | Clinicaltrialsregister.eu |
| Tolvaptan | NCT01451827    | Kidney | Completed; Phase 2 trial; 178 ADPKD patients; multi-center double-blind. Compare short-term effects of immediate and modified release tolvaptan. (50/80 mg or 60/30 mg daily).                                     | Clinicaltrials.gov        |
| Tolvaptan | NCT02009878    | Kidney | Completed; Phase ½, multi-center, double-blind trial; 30 patients with syndrome of inappropriate ADH secretion. Tolvaptan pharmacokinetics, pharmacodynamics and effects on hematic and urine “salt” (3.75-15 mg). | Clinicaltrials.gov        |
| Tolvaptan | 2014-000226-38 | Kidney | Completed; Phase 3, multi-center, double-blind trial; ADPKD patients with late-stage 2-4 CKD. Tolvaptan efficacy to reduce eGFR decline (45-120 mg/day).                                                           | Clinicaltrialsregister.eu |
| Tolvaptan | NCT03803124    | Kidney | Completed; Phase 3 trial; 20 ADPKD patients. Tolvaptan effects on renal blood flow and vasoactive hormones.                                                                                                        | Clinicaltrials.gov        |
| Tolvaptan | NCT01336972    | Kidney | Completed; Phase 2 trial; 29 ADPKD patients, various levels of renal function. Three-weeks effect on eGFR and TKV of tolvaptan at the highest tolerated split-dose (45/15 mg-90/30 mg).                            | Clinicaltrials.gov        |
| Tolvaptan | NCT01280721    | Kidney | Completed; Phase 3 trial; multi-center; 135 ADPKD patients enrolled in Trial 156-04-251. Tolvaptan effect on TKV and renal function (Oral administration, 45/15 mg-90/30 mg).                                      | Clinicaltrials.gov        |

|           |             |        |                                                                                                                                                                                                                                       |                                  |
|-----------|-------------|--------|---------------------------------------------------------------------------------------------------------------------------------------------------------------------------------------------------------------------------------------|----------------------------------|
| Tolvaptan | NCT01214421 | Kidney | Completed; Phase 3 trial, multi-center; 1083 ADPKS patients from trial 156-04-251. Tolvaptan effects on TKV and renal function (45/15 mg-90/30 mg).                                                                                   | Clinicaltrials.gov               |
| Tolvaptan | NCT01430494 | Kidney | Completed; Phase N/A; 3409 ADPKD patients. Changes in TKV vs. ADPKD-related outcomes over one year.                                                                                                                                   | Clinicaltrials.gov               |
| Tolvaptan | NCT00841568 | Kidney | Completed; Phase 2 trial; 17 ADPKD patients from dose-finding study 156-04-001. Three-year safety and efficacy of tolvaptan/OPC-41061 (15 mg twice daily).                                                                            | Clinicaltrials.gov               |
| Tolvaptan | NCT01022424 | Kidney | Completed; Phase 3 trial; 13 ADPKD patients from study 156-05-002. Administration was continued until tolvaptan/OPC-41061 approval for ADPKD in Japan (15 mg twice daily).                                                            | Clinicaltrials.gov               |
| Tolvaptan | GCT03101362 | Kidney | Completed; Phase 3; ADPKD patients who enrolled in Trial 156-04-251. Evaluate long-term effects of tolvaptan (45m/15 mg, 60/30mg, 90/30mg, split dose).                                                                               | Globalclinicaltrial<br>sdata.com |
| Tolvaptan | NCT03858439 | Kidney | Not yet recruiting; Phase N/A; 15 ADPKD patients. Dietary intervention on urine output and quality of life during tolvaptan treatment (15/15-30/30 mg daily).                                                                         | Clinicaltrials.gov               |
| Tolvaptan | NCT02497521 | Kidney | Recruiting; Phase N/A; multi-center; 500 ADPKD patients. Ten-year study of tolvaptan dosage and parameters of ADPKD progression and renal function vs. placebo.                                                                       | Clinicaltrials.gov               |
| Tolvaptan | NCT02964273 | Kidney | Recruiting; Phase 3 trial; multi-center double-blind 1year/open label 2-year; 91 ADPKD children and adolescent patients. Tolvaptan safety, pharmacokinetics, pharmacodynamics in specific age group (15/7.5 mg-45/15 mg, split-dose). | Clinicaltrials.gov               |
| Tolvaptan | NCT02729662 | Kidney | In progress; Phase N/A; 118                                                                                                                                                                                                           | Clinicaltrials.gov               |

|           |                |        |                                                                                                                                                                                                                                             |                              |
|-----------|----------------|--------|---------------------------------------------------------------------------------------------------------------------------------------------------------------------------------------------------------------------------------------------|------------------------------|
|           |                |        | ADPKD patients. Five-year tolvaptan efficacy in reducing TKV increase in relation to PKD1, 2 genotype.                                                                                                                                      |                              |
| Tolvaptan | NCT03596957    | Kidney | Not yet recruiting; Phase 4 trial; 90 ADPKD patients. Measure TKV following tolvaptan (vs. placebo) treatment for six weeks followed by six weeks without medication.                                                                       | Clinicaltrials.gov           |
| Tolvaptan | NCT02251275    | Kidney | Active, not recruiting; Phase 3 trial; multi-center open label trial; 1083 ADPKD patients from 156-13-210, 156-08-271, 156-04-251, or 156-09-290; Establish tolvaptan forty-two weeks safety (15/15 mg-90/30 mg split-dose).                | Clinicaltrials.gov           |
| Tolvaptan | 2016-000187-42 | Kidney | In progress; Phase 3 multi-center double-blind trial; ADPKD patients, children and adolescents. One-year double-blind, plus two-year open label to assess tolvaptan safety, pharmacokinetics, tolerability, efficacy in pediatric patients. | Clinicaltrialsregister.eu    |
| Tolvaptan | 2017-004701-40 | Kidney | Active, not recruiting; Phase 2 trial; 20 ADPKD patients with normal kidney function. Evaluate the effect of 4-week tolvaptan and octreotide LAR combination therapy vs. tolvaptan and placebo on GFR.                                      | Clinicaltrialsregister.eu    |
| Tolvaptan | NCT02925221    | Kidney | Recruiting; Phase N/A; 500 ADPKD patients on tolvaptan therapy. Part of the Health Canada approval requirement for tolvaptan with Patient Reported Outcome Questionnaires, time to renal replacement therapy, long-term mortality.          | Clinicaltrials.gov           |
| Tolvaptan | GCT07070402    | Kidney | Unknown status; Phase 3 trial; Three-year study of tolvaptan tolerability (45/15- 90/30 mg split-dose).                                                                                                                                     | Globalclinicaltrialsdata.com |
| Tolvaptan | 2017-003864-10 | Kidney | Active, not recruiting; Phase 2 pilot study; 12 ADPKD patients; randomized placebo-controlled                                                                                                                                               | Clinicaltrialsregister.eu    |

|            |                |        |                                                                                                                                                     |                           |
|------------|----------------|--------|-----------------------------------------------------------------------------------------------------------------------------------------------------|---------------------------|
|            |                |        | double blind; Assess short-term effects of tolvaptan (120 mg daily).                                                                                |                           |
| Tolvaptan  | NCT02847624    | Kidney | Recruiting; Phase N/A; 1600 ADPKD patients; evaluate the safety and effectiveness of tolvaptan.                                                     | Clinicaltrials.gov        |
| Tolvaptan  | NCT03541447    | Kidney | Recruiting; Phase 2 trial; 20 ADPKD patients; Evaluate additional short-term effect of Tolvaptan and Octreotide.                                    | Clinicaltrials.gov        |
| Tolvaptan  | NCT03949894    | Kidney | Active, not recruiting; Phase 4 trial; 100 adult ADPKD Korean patients; Evaluate safety and therapeutic effectiveness of tolvaptan (30mg and 15mg). | Clinicaltrials.gov        |
| Lixivaptan | NCT03487913    | Kidney | Active, recruiting; Phase 2 trial; 32 adult ADPKD patients; Evaluate pharmacokinetics and safety of lixivaptan.                                     | Clinicaltrials.gov        |
| Lixivaptan | NCT01056848    | Heart  | Completed; 135 adult hyponatremia patients; Evaluate safety of lixivaptan.                                                                          | Clinicaltrials.gov        |
| Lixivaptan | NCT00660959    | Heart  | Completed; Phase 3 trial; 103 adult hyponatremia patients; Evaluate safety of lixivaptan.                                                           | Clinicaltrials.gov        |
| Lixivaptan | NCT01055912    | Heart  | Completed; Phase 3 trial; 130 HF patients; Evaluate oral lixivaptan in HF patients (100mg once daily).                                              | Clinicaltrials.gov        |
| Lixivaptan | NCT00876798    | Heart  | Completed; Phase 3 trial; 206 hyponatremia patients; Evaluate safety of oral lixivaptan doses (25, 50 and 100mg daily).                             | Clinicaltrials.gov        |
| Lixivaptan | NCT00876876    | Heart  | Terminated; Phase 3 trial; 300 hyponatremia patients; 12-week lixivaptan treatment (25, 50mg).                                                      | Clinicaltrials.gov        |
| Lixivaptan | 2009-016371-30 | Heart  | Completed; Phase 3 trial; 150 hyponatremia patients; assess safety of long term lixivaptan treatment; extension of study NCT00578695.               | Clinicaltrialsregister.eu |
| Lixivaptan | NCT00578695    | Heart  | Completed; Phase 3 trial; 652 adult HF patients; Evaluate safety of lixivaptan.                                                                     | Clinicaltrials.gov        |
| Lixivaptan | NCT04152837    | Kidney | Not recruiting; Phase 3 trial; 50                                                                                                                   | Clinicaltrials.gov        |

|            |                |                 |                                                                                                                                                                           |                           |
|------------|----------------|-----------------|---------------------------------------------------------------------------------------------------------------------------------------------------------------------------|---------------------------|
|            |                | Liver           | adult ADPKD patients; Evaluate liver function and non-hepatic safety (100-200mg daily).                                                                                   |                           |
| Lixivaptan | NCT04064346    | Kidney          | Not recruiting; Phase 3 trial; 1200 adult ADPKD patients; Evaluate efficacy and safety of lixivaptan (100-200mg twice daily).                                             | Clinicaltrials.gov        |
| Lixivaptan | 2008-003191-21 | Heart           | Completed; Phase 3 trial; 200 adult hyponatremia patients; Evaluate safety and efficacy of lixivaptan.                                                                    | Clinicaltrialsregister.eu |
| Lixivaptan | 2006-001754-26 | Heart           | Completed; Phase 3 trial; 100 adult hyponatremia patients; Evaluate safety and efficacy of lixivaptan.                                                                    | Clinicaltrialsregister.eu |
| Lixivaptan | NCT03717181    | Kidney          | Not recruiting; Phase 2 trial; 1 adult ADPKD patient; Evaluate lixivaptan ability to eliminate abdominal pain.                                                            | Clinicaltrials.gov        |
| Satavaptan | 2006-000134-12 | Kidney<br>Liver | Terminated; Phase 3 trial; 250 ADPKD patients; Evaluated efficacy of satavaptan in reducing ascites (5-10 mg daily).                                                      | Clinicaltrialsregister.eu |
| Satavaptan | 2006-000135-10 | Kidney<br>Liver | Completed; Phase 3 trial; 250 ADPKD patients; Evaluate satavaptan efficacy without concomitant diuretics in reducing ascite recurrence (5-10mg daily).                    | Clinicaltrialsregister.eu |
| Satavaptan | NCT00359437    | Kidney          | Terminated; Phase 3 trial; 501 ADPKD with liver cirrhosis patients; Evaluate efficacy to prevent ascites recurrence (5-10mg daily for 52 weeks).                          | Clinicaltrials.gov        |
| Satavaptan | 2006-000132-27 | Liver           | Active; Phase 3 trial; 501 patients with liver cirrhosis; Evaluate efficacy of satavaptan on top of medication for liver cirrhosis (5-10mg daily).                        | Clinicaltrialsregister.eu |
| Satavaptan | NCT00358878    | Liver           | Completed; Phase 3 trial; 463 liver cirrhosis and ascites patients; Evaluate efficacy to treat liver cirrhosis and ascites (5-10mg dose daily; 52-week treatment period). | Clinicaltrials.gov        |
| Satavaptan | 2006-005753-29 | Liver           | Active; Phase 2 trial; 80 patients                                                                                                                                        | Clinicaltrialsregister    |

|            |             |        |                                                                                                                                                                                         |                    |
|------------|-------------|--------|-----------------------------------------------------------------------------------------------------------------------------------------------------------------------------------------|--------------------|
|            |             |        | with liver cirrhotic ascites; Assess safety and tolerability of continued long-term satavaptan treatment.                                                                               | er.eu              |
| Conivaptan | NCT01752543 | Heart  | Completed; Phase 4 trial; 20 HF patients; Evaluated effects of AVP blockade and central hemodynamic system (20 mg bolus followed by infusion of 2 mg/hour).                             | Clinicaltrials.gov |
| Conivaptan | NCT00435591 | Heart  | Completed; Phase 4 trial; 121 hyponatremia patients; Evaluate effectiveness and safety of multiple dosing regimens of IV conivaptan (20 mg/day continuous infusion).                    | Clinicaltrials.gov |
| Conivaptan | NCT00843986 | Heart  | Terminated; Phase 3 trial; 9 patients with acute decompensated heart failure; Evaluate safety and effectiveness of conivaptan (20 mg/day continuous intravenous infusion for 48 hours). | Clinicaltrials.gov |
| Conivaptan | NCT00478192 | Heart  | Completed; Phase 3 trial; 50 patients with hypervolemic hyponatremia; Evaluated efficacy and safety of multiple infusions of conivaptan (20 mg twice a day).                            | Clinicaltrials.gov |
| Conivaptan | NCT00057356 | Heart  | Completed; Phase 2 trial; 170 HF patients; randomized, double-blind, placebo-controlled, dose ranging pilot study; Evaluated effects of conivaptan.                                     | Clinicaltrials.gov |
| Conivaptan | NCT00924014 | Kidney | Unknown status; Phase N/A; 8 patients ADPKD; Compare effects of conivaptan and diuretics on renal blood flow and neurohormones (20 mg intravenous).                                     | Clinicaltrials.gov |
| Conivaptan | NCT00887627 | Kidney | Completed; Phase 1 trial; 25 ADPKD patients; Compare conivaptan pharmacokinetics in subjects with mild or moderate                                                                      | Clinicaltrials.gov |

|             |                                |                     |                                                                                                                                                                                        |                    |
|-------------|--------------------------------|---------------------|----------------------------------------------------------------------------------------------------------------------------------------------------------------------------------------|--------------------|
|             |                                |                     | kidney function (48 hour continuous infusion).                                                                                                                                         |                    |
| Conivaptan  | NCT00851227                    | Liver               | Completed; Phase 1 trial; 25 patients with liver impairment; Compared 48-hour continuous infusion of conivaptan vs subjects with normal liver function.                                | Clinicaltrials.gov |
| Balovaptan  | NCT04049578                    | Brain               | Not yet recruiting; Phase 1 trial; 10 patients with Autism Spectrum Disorder (ASD); Evaluate pharmacokinetics, safety and tolerability (Oral dose once a day 6-week treatment period). | Clinicaltrials.gov |
| Balovaptan  | NCT03504917                    | Brain               | Terminated; Phase 3 trial; 350 patients with ASD; Evaluate efficacy, safety, and pharmacokinetics (10 mg of oral administration once a day).                                           | Clinicaltrials.gov |
| Balovaptan  | NCT02901431                    | Brain               | Terminated; Phase 2 trial; 300 ASD patients; Evaluate efficacy and safety (10mg/day for 24 weeks).                                                                                     | Clinicaltrials.gov |
| Relcovaptan | DOI: 10.1080/09513590400021144 | Reproductive system | Completed; 18 women with pre-term pregnancy; Evaluate effect of relcovaptan on uterine contractions in preterm labor (single dose of 400mg relcovaptan).                               | PubMed             |
| Mozavaptan  | DOI: 10.1093/jjco/hyq170       | Kidney              | Completed; 16 ADH syndrome patients; Evaluated clinical implication of AVPR antagonist mozavaptan hydrochloride (30 mg/day).                                                           | PubMed             |
|             |                                |                     |                                                                                                                                                                                        |                    |
| AVP         | NCT01327027                    | Brain               | Completed; Phase 1 trial; 225 healthy participants. AVP effects on emotional and social communication (One of two doses (20 or 40IU)).                                                 | Clinicaltrials.gov |
| AVP         | NCT02626832                    | Brain               | Completed; Diagnostic trial (Phase N/A); 25 patients with depression and schizophrenia. NMDA receptor function and AVP effects in these conditions.                                    | Clinicaltrials.gov |



|              |             |        |                                                                                                                                                                                                                        |                    |
|--------------|-------------|--------|------------------------------------------------------------------------------------------------------------------------------------------------------------------------------------------------------------------------|--------------------|
| AVP          | NCT02153502 | Brain  | Completed; Phase 2 trial; 206 patients suffering from major depressive disorder. Efficacy, safety and tolerability of AVP-786 as an adjunctive therapy for depression (AVP-786 administered twice a day for 10 weeks). | Clinicaltrials.gov |
| AVP          | NCT02394054 | Brain  | Completed; Early Phase 1 trial; 84 participants; AVP effects on the social brain (i.e. deception detection, empathy, altruism, responses to photo stimuli) (20 IU, intranasal).                                        | Clinicaltrials.gov |
| AVP          | NCT00628550 | Heart  | Completed; Phase 1 trial; 130 pediatric cardiopulmonary resuscitation patients. Evaluate AVP administration in advanced CPR (One dose of 0.8 units/kg intravenous).                                                    | Clinicaltrials.gov |
| AVP          | NCT01247090 | Kidney | Completed; Phase 2 trial; 12 participants with chronic hypertension and end stage renal disease (ESRD). AVP effects (0.15 mU/kg/min by infusion at thrice-weekly dialysis treatments for 2 weeks).                     | Clinicaltrials.gov |
| Desmopressin | NCT01645475 | Brain  | Completed; Phase 4 trial; 30 monosymptomatic nocturnal enuresis participants. Impact of desmopressin on ADHD symptoms, cognition, learning, sleep, quality of life and self-esteem.                                    | Clinicaltrials.gov |
| Desmopressin | NCT02068560 | Kidney | Completed; Interventional trial (Phase N/A); 64 healthy participants; Sex differences in the renal sensitivity to desmopressin (Three doses of 0.0003µg/kg, 0.0005µg/kg and 0.004µg/kg, by infusion).                  | Clinicaltrials.gov |
| Desmopressin | NCT02937896 | Kidney | Completed; Interventional trial (Phase N/A); 40 renal colic patients. Compare efficacy of intranasal desmopressin and intravenous ketorolac (40 µg of desmopressin intranasally and 30                                 | Clinicaltrials.gov |

|              |             |                 |                                                                                                                                                                                                                                                  |                    |
|--------------|-------------|-----------------|--------------------------------------------------------------------------------------------------------------------------------------------------------------------------------------------------------------------------------------------------|--------------------|
|              |             |                 | mg ketorolac intravenous).                                                                                                                                                                                                                       |                    |
| Desmopressin | NCT00748072 | Kidney          | Completed; Phase 4 trial; 162 participants subject to renal biopsy. Effects of prior desmopressin treatment on post-biopsy bleeding complications (0.3 mcg/kg of desmopressin 1 hour before renal biopsy).                                       | Clinicaltrials.gov |
| Terlipressin | NCT02059460 | Kidney          | Completed; Phase 4 trial; 25 participants; Impact of intra and post-operative terlipressin infusion on the occurrence of acute kidney injury (AKI) (1-4 µg/kg/h, continuous infusion).                                                           | Clinicaltrials.gov |
| Terlipressin | NCT03846180 | Kidney          | Completed; Observational trial (Phase N/A); 1682 cirrhotic patients. Effects of terlipressin on renal function.                                                                                                                                  | Clinicaltrials.gov |
| Terlipressin | NCT01637454 | Kidney<br>Liver | Completed; Phase 3 trial; 46 type 2 hepatorenal syndrome patients. Safety and efficacy of terlipressin and noradrenaline combination therapy (0.5 mg terlipressin every 6 hours, intravenous and continuous infusion of 0.5 mg/h noradrenaline). | Clinicaltrials.gov |
| Terlipressin | NCT02770716 | Kidney<br>Liver | Completed; Phase 3 trial; 300 type 1 hepatorenal syndrome patients. Efficacy and safety (1 mg every 6 hours, intravenous). .                                                                                                                     | Clinicaltrials.gov |
| Terlipressin | NCT01932151 | Kidney<br>Liver | Completed; Interventional trial (Phase N/A); 18 type 1 hepatorenal syndrome patients. Efficacy and safety (1 mg every 4 hours, intravenous).                                                                                                     | Clinicaltrials.gov |
| Terlipressin | NCT04416282 | Kidney<br>Liver | Recruiting; Interventional trial (Phase N/A); 140 hepatorenal syndrome- acute kidney injury patients. Efficacy of terlipressin and albumin combination therapy (2 mg terlipressin every 24 hours, infusion and 1 g/kg/day albumin, intravenous). | Clinicaltrials.gov |
| Terlipressin | NCT03822091 | Kidney<br>Liver | Recruiting; Phase 3 trial; 60 type 1 hepatorenal syndrome patients. Effects of terlipressin infusion alone vs. in combination with                                                                                                               | Clinicaltrials.gov |

|             |             |     |                                                                                                                                                                                                                     |                    |
|-------------|-------------|-----|---------------------------------------------------------------------------------------------------------------------------------------------------------------------------------------------------------------------|--------------------|
|             |             |     | noradrenaline (2mg every 24 hours, infusion and 0.5 mg/h noradrenaline continuous infusion).                                                                                                                        |                    |
| Felypressin | NCT04236115 | N/A | Completed; Phase 4 trial; 95 participants. Felypressin is used as a vasoconstrictor to compare articaine and prilocaine for maxillary teeth extraction (One dose of felypressin of 0.03 IU/ml).                     | Clinicaltrials.gov |
| Felypressin | NCT01073371 | N/A | Completed; Phase 1 trial; 32 participants. In this study, Felypressin is used as a vasoconstrictor to test the efficacy of prilocaine in maxillary infiltration anesthesia (One dose of felypressin of 0.03 IU/ml). | Clinicaltrials.gov |
